# Supplementary material for: The impact of the histidyl residue position on the formation and stability of Cu(ii) complexes and their ability of ROS generation
Source: Royal Society of Chemistry journal article supplement (doi:10.1039/d1nj00617g), 2021-01-01
Supplement: d1nj00617g1.pdf [file d1nj00617g1.pdf]

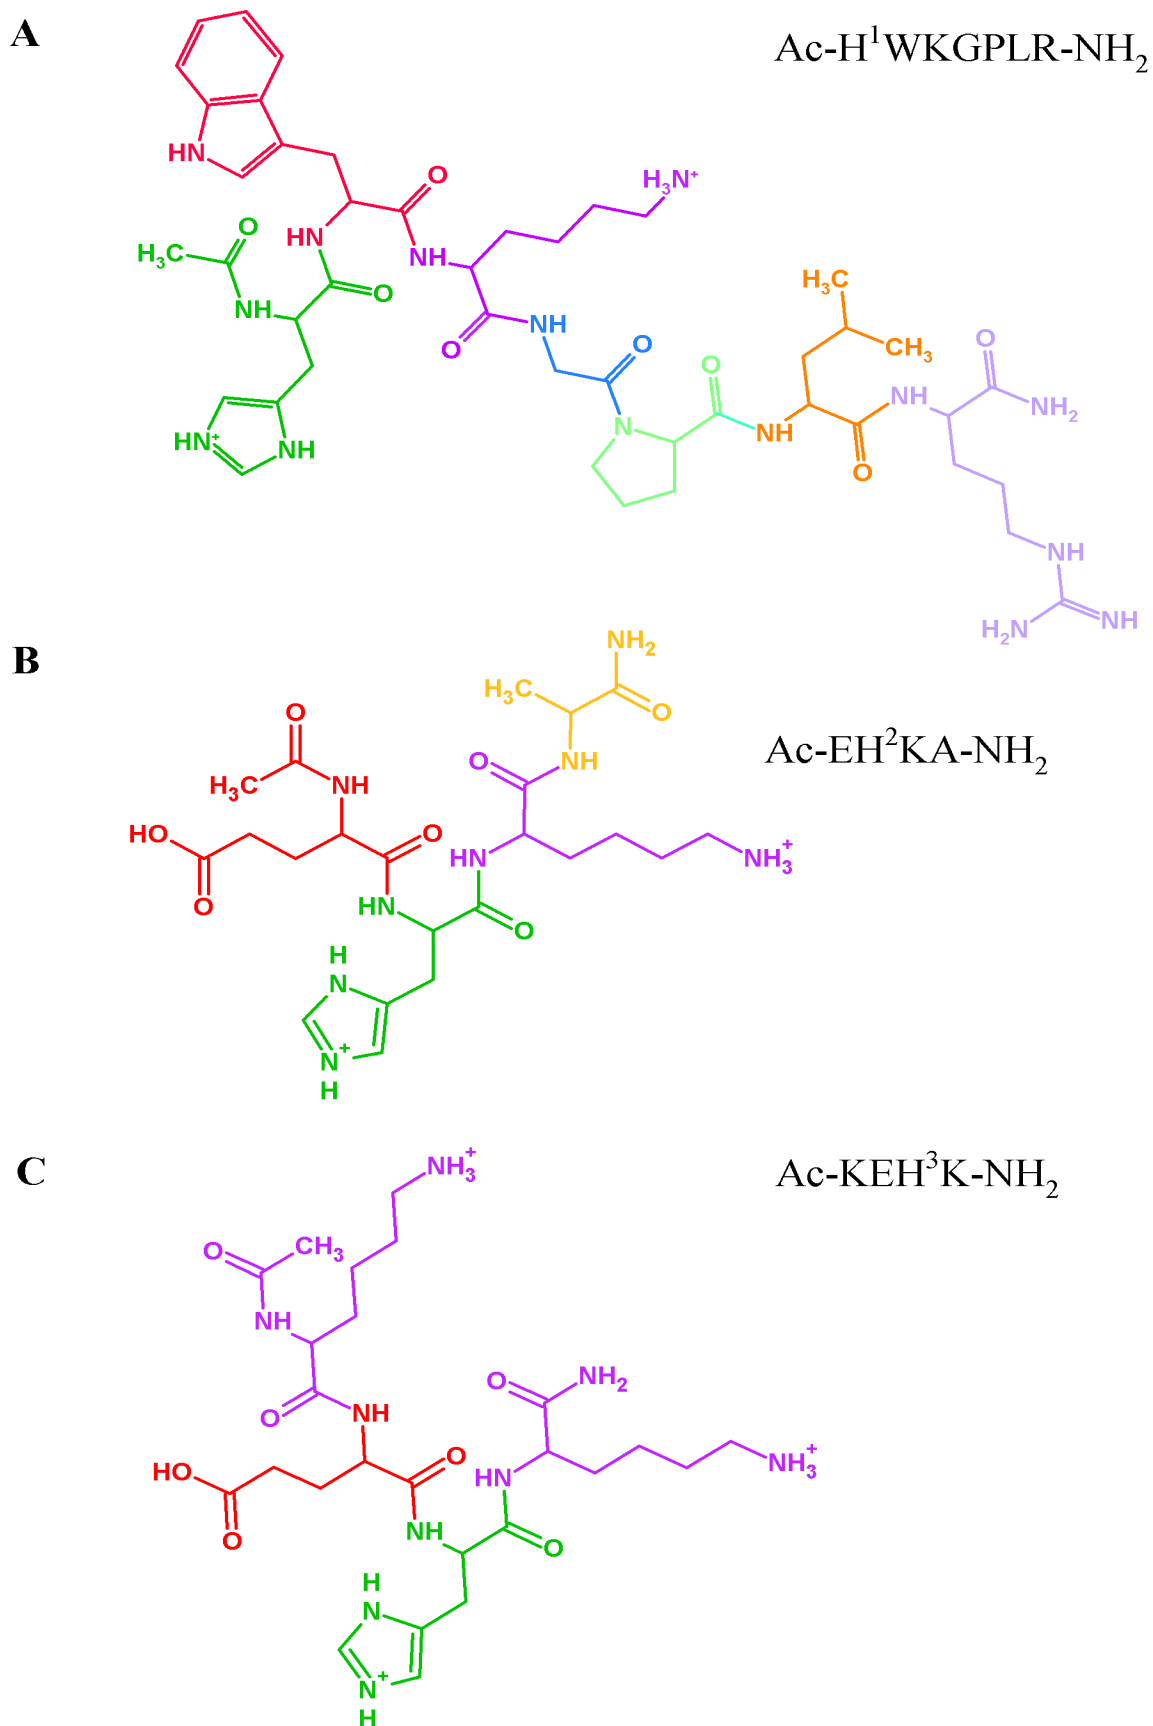

**Fig. S1** The structural formulas of the studied A) Ac-H<sup>1</sup>WKGPLR-NH<sub>2</sub> (**L1**) B) Ac-EH<sup>2</sup>KA-NH<sub>2</sub> (**L2**) and C) Ac-KEH<sup>3</sup>K-NH<sub>2</sub> (**L3**) ligands in a fully protonated form.

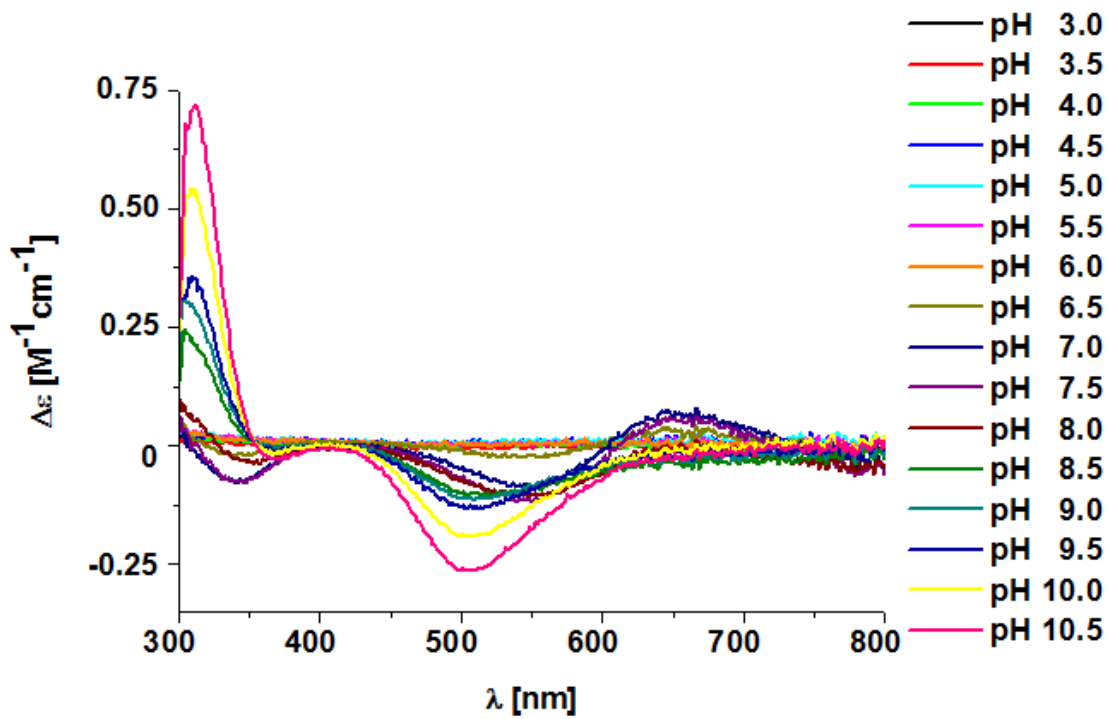

**Fig. S2** CD spectra of the Cu(II)-Ac-**H<sup>1</sup>WKGPLR-NH<sub>2</sub>** (**CuL1**) system in the Vis region as a function of pH. Cu:L=1:1, [Cu(II)]=0.001M.

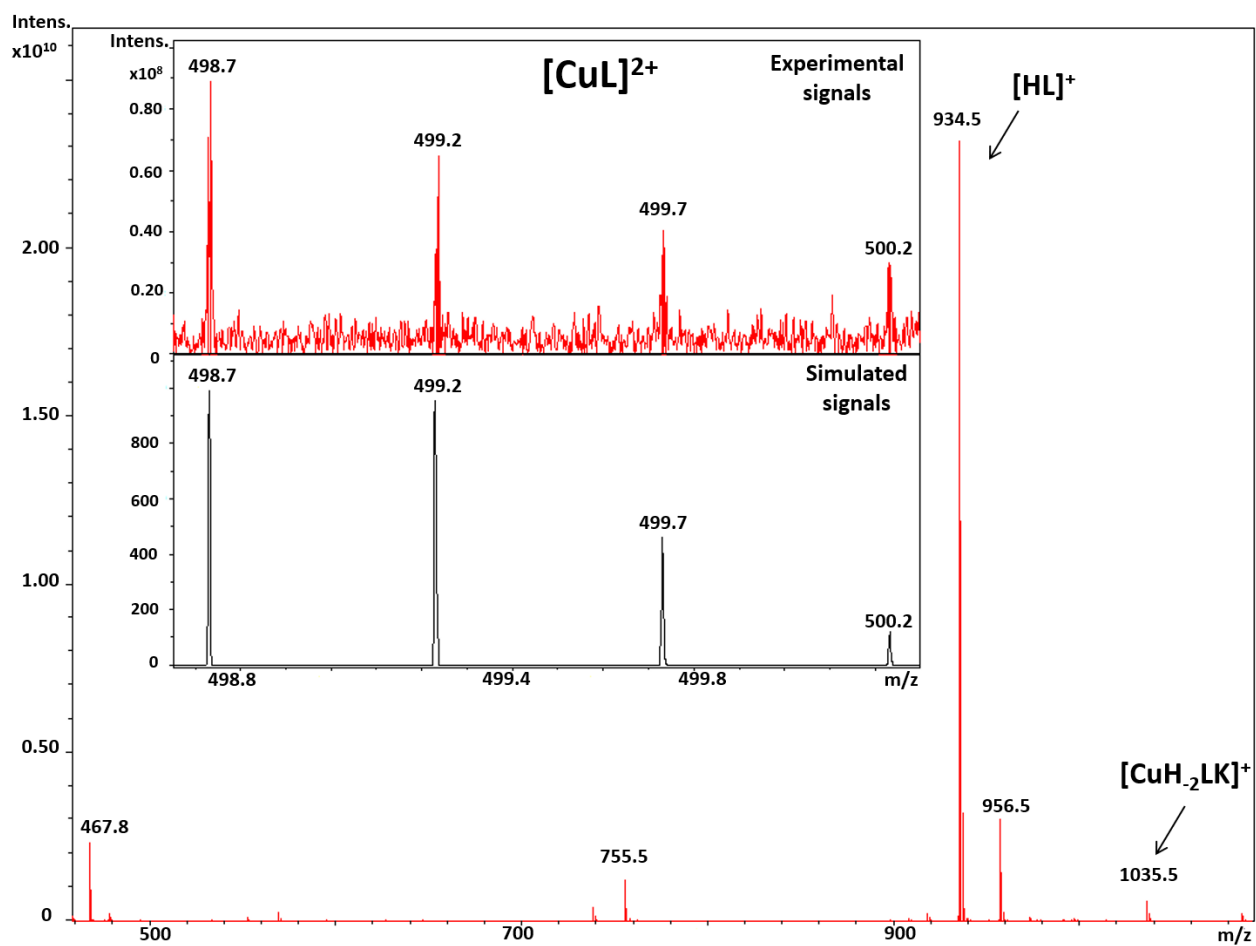

**Fig. S3** ESI mass spectrum of the **CuL1** complex (Cu:L=1:1) in aqueous solution (pH ~ 7). As an insert experimental and simulated spectrum of the [CuL]<sup>2+</sup> ion ( $m/z=498.7$  Da) are shown.

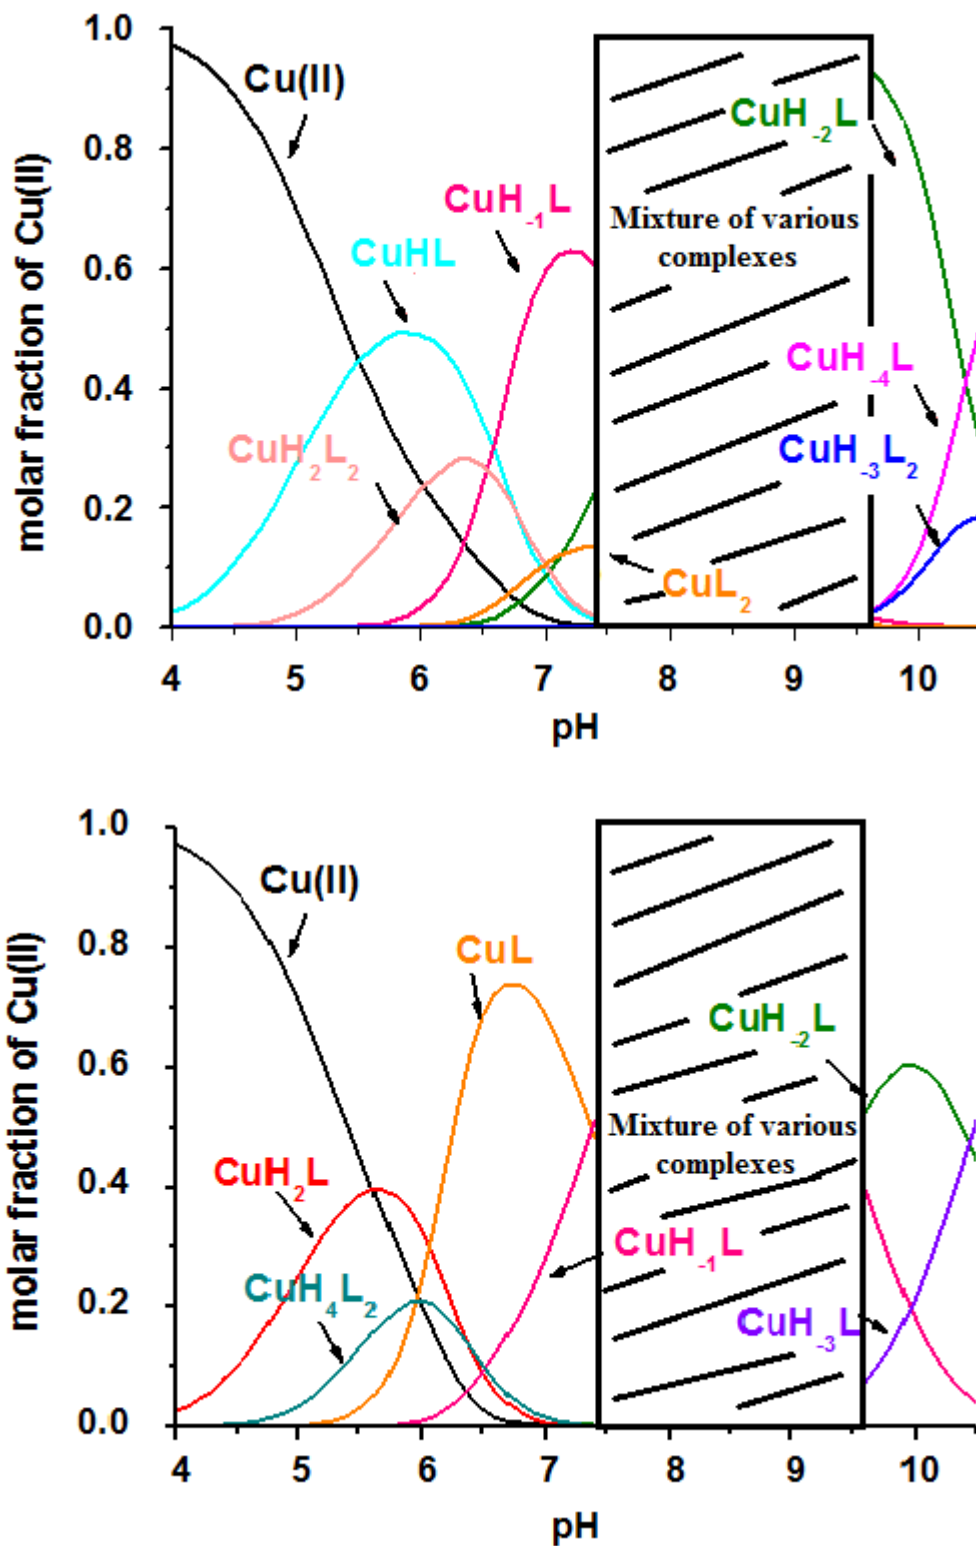

**Fig. S4** Species distribution diagram of Cu(II) bis-complexes with A) Ac-EH<sup>2</sup>KA-NH<sub>2</sub> (L<sub>2</sub>) and B) Ac-KEH<sup>3</sup>K-NH<sub>2</sub> (L<sub>3</sub>) ligands as a function of pH. Molar ratio Cu:L=1:2, [Cu(II)]=0.001 M.

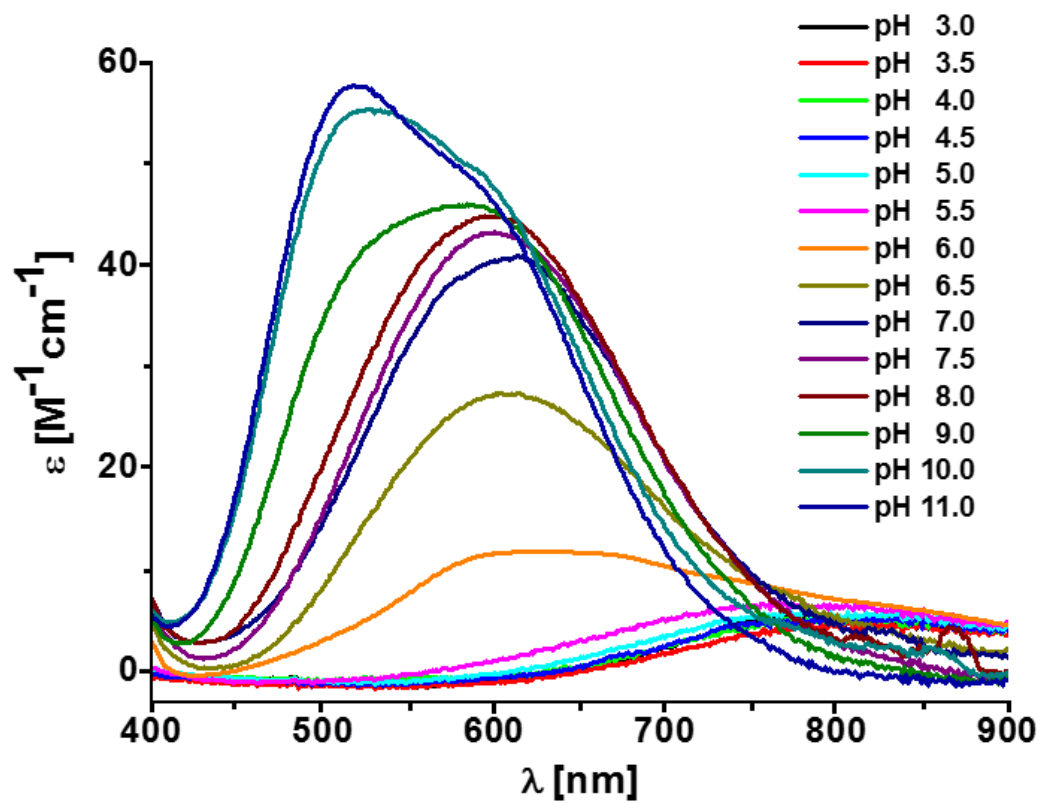

**Fig. S5** Electronic absorption spectra of the Cu(II)-Ac-KEH<sup>3</sup>K-NH<sub>2</sub> (CuL3) complex as a function of pH. Cu:L=1:1, [Cu(II)]=0.001 M.

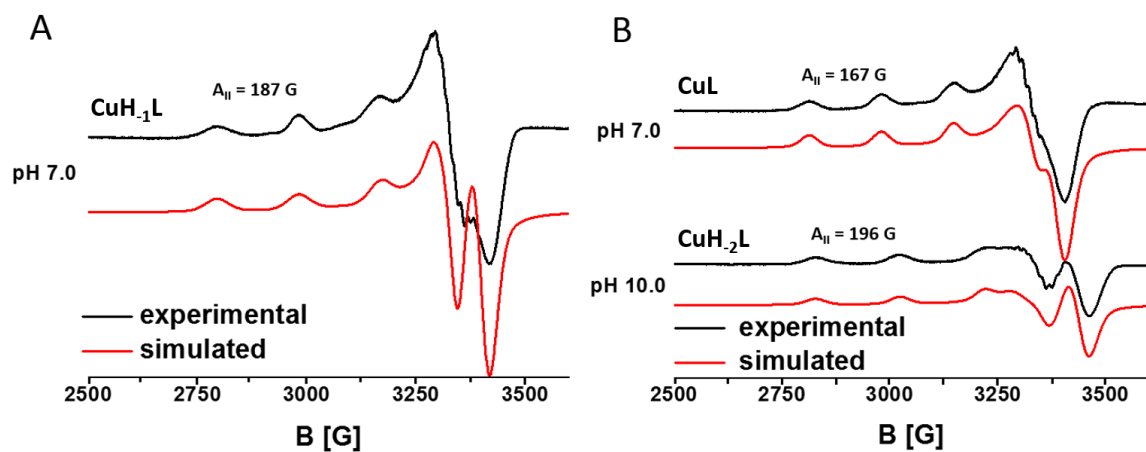

**Fig. S6** EPR spectra of a frozen solution of A) Cu(II)-Ac-EH<sup>2</sup>KA-NH<sub>2</sub> (**CuL2**) and B) Cu(II)-Ac-KEH<sup>3</sup>K-NH<sub>2</sub> (**CuL3**) complexes at various pH values. Cu:L=1:1, [Cu(II)]=0.001 M.

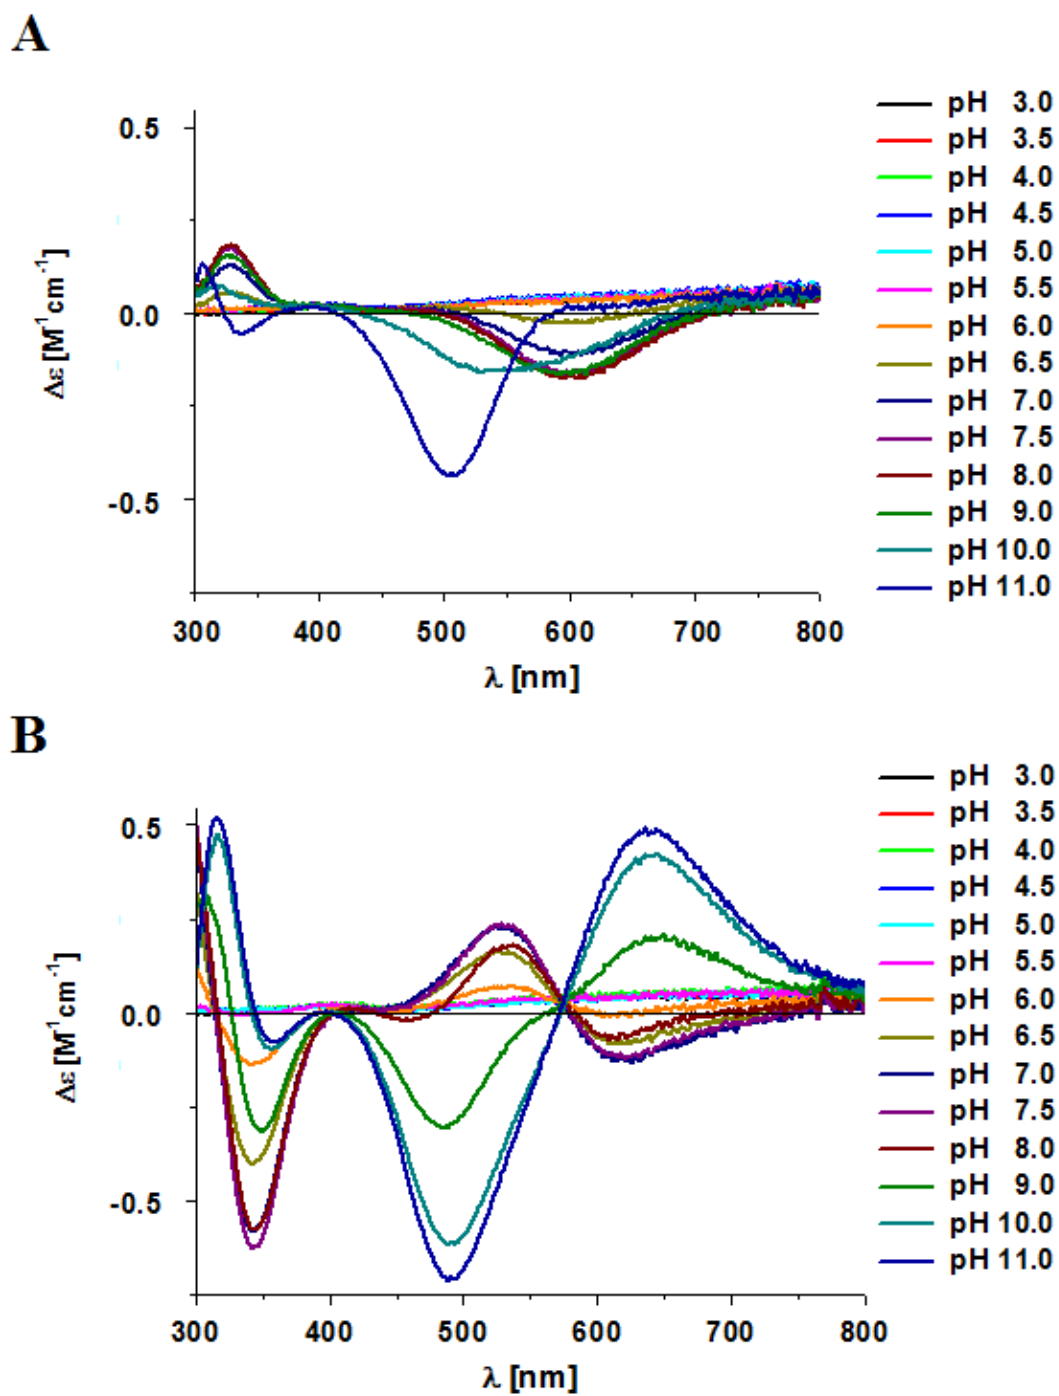

**Fig. S7** CD spectra of A) Cu(II)-Ac-EH<sup>2</sup>KA-NH<sub>2</sub> (CuL<sub>2</sub>) and B) Cu(II)-Ac-KEH<sup>3</sup>K-NH<sub>2</sub> (CuL<sub>3</sub>) complexes in the Vis region as a function of pH. Cu:L=1:1, [Cu(II)]=0.001 M.

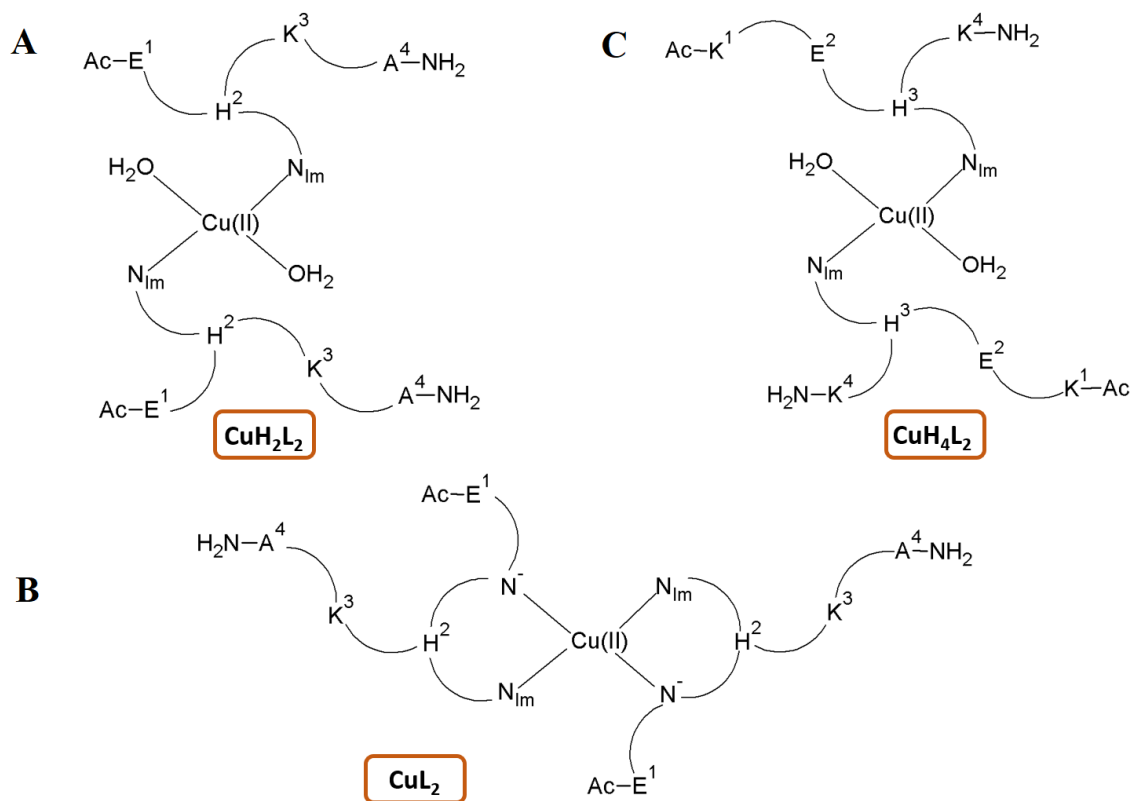

**Fig. S8** Schematic representation of the proposed bis-complexes structures: A)  $\text{CuH}_2\text{L}_2$ , B)  $\text{CuL}_2$  of the **CuL2** complex and C)  $\text{CuH}_4\text{L}_2$  of the **CuL3** complex.



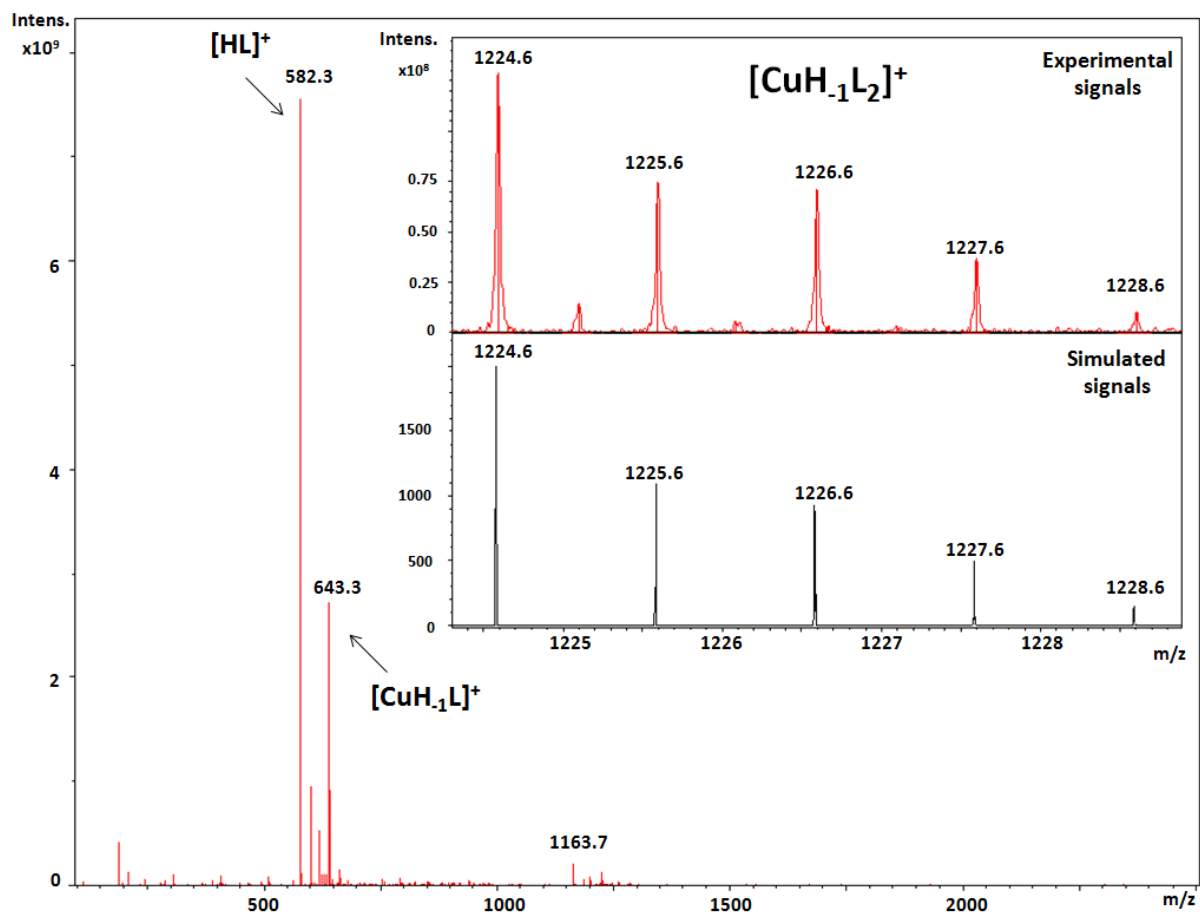

**Fig. S9** ESI mass spectrum of the **CuL3** complex (Cu:L=1:2) in aqueous solution (pH ~ 7). As an insert experimental and simulated spectra of the **[CuH<sub>-1</sub>L<sub>2</sub>]<sup>+</sup>** ion ( $m/z = 1224.6$  Da) are shown.

**Table S1** The deprotonation constants for amide protons ( $pK_a$  values) for Cu(II) complexes with studied ligands and peptides found in the literature.

| Peptide                                                                                                                                                                                                                                | $pK_{1(\text{amide})}$ | $pK_{2(\text{amide})}$ | $pK_{3(\text{amide})}$<br>OR $pK_{H_2O\text{coord.}}$ |
|----------------------------------------------------------------------------------------------------------------------------------------------------------------------------------------------------------------------------------------|------------------------|------------------------|-------------------------------------------------------|
| <b>H<sup>1</sup></b>                                                                                                                                                                                                                   |                        |                        |                                                       |
| Ac- <b>H<sup>1</sup></b> WKGPLR-NH <sub>2</sub> (L1)                                                                                                                                                                                   | 6.42                   | 6.66                   | 7.33                                                  |
| Ac- <b>H<sup>1</sup></b> GGG <sup>a</sup>                                                                                                                                                                                              | 6.60                   | 6.96                   | 8.92                                                  |
| Ac- <b>H<sup>1</sup></b> GGGWGQ-NH <sub>2</sub> <sup>b</sup>                                                                                                                                                                           | 6.49                   | 6.19                   | 8.98                                                  |
| <b>H<sup>2</sup></b>                                                                                                                                                                                                                   |                        |                        |                                                       |
| Ac-E <b>H<sup>2</sup></b> KA-NH <sub>2</sub> (L2)                                                                                                                                                                                      | -                      | -                      | 7.83                                                  |
| Ac-G <b>H<sup>2</sup></b> GG <sup>a</sup>                                                                                                                                                                                              | 6.11                   | 6.12                   | 10.76                                                 |
| Ac-P <b>H<sup>2</sup></b> SFN <sup>c</sup>                                                                                                                                                                                             | 6.48                   | 6.62                   | 8.38                                                  |
| Ac-P <b>H<sup>2</sup></b> SRN <sup>c</sup>                                                                                                                                                                                             | 6.66                   | 6.44                   | 8.93                                                  |
| <b>H<sup>3</sup></b>                                                                                                                                                                                                                   |                        |                        |                                                       |
| Ac-KE <b>H<sup>3</sup></b> K-NH <sub>2</sub> (L3)                                                                                                                                                                                      | -                      | -                      | 7.38                                                  |
| Ac-GG <b>H<sup>3</sup></b> G <sup>a</sup>                                                                                                                                                                                              | 6.05                   | 6.43                   | 8.95                                                  |
| Ac-LA <b>H<sup>3</sup></b> YNK <sup>d</sup>                                                                                                                                                                                            | 5.75                   | -                      | 9.04                                                  |
| Ac-GG <b>H<sup>3</sup></b> <sup>e</sup>                                                                                                                                                                                                | 6.50                   | 7.35                   | 9.25                                                  |
| Ac-Y <b>H<sup>3</sup></b> <sup>f</sup>                                                                                                                                                                                                 | 6.99                   | 7.34                   | 8.92                                                  |
| Ac-G <b>H<sup>3</sup></b> S-NH <sub>2</sub> <sup>g</sup>                                                                                                                                                                               | 6.08                   | 6.08                   | 7.97                                                  |
| Ac-FK <b>H<sup>3</sup></b> V-NH <sub>2</sub> <sup>g</sup>                                                                                                                                                                              | 5.93                   | 5.93                   | 8.52                                                  |
| Ac-MK <b>H<sup>3</sup></b> M-NH <sub>2</sub> <sup>g</sup>                                                                                                                                                                              | 5.64                   | 5.64                   | 8.96                                                  |
| Ac-KG <b>H<sup>3</sup></b> GNG-NH <sub>2</sub> <sup>h</sup>                                                                                                                                                                            | 5.56                   | 6.06                   | 8.90                                                  |
| Ac-SK <b>H<sup>3</sup></b> M-NH <sub>2</sub> <sup>i</sup>                                                                                                                                                                              | -                      | -                      | 7.75                                                  |
| <sup>a</sup> ref. [28]<br><sup>b</sup> ref. [45]<br><sup>c</sup> ref. [46]<br><sup>d</sup> ref. [47]<br><sup>e</sup> ref. [48]<br><sup>f</sup> ref. [49]<br><sup>g</sup> ref. [50]<br><sup>h</sup> ref. [44]<br><sup>i</sup> ref. [58] |                        |                        |                                                       |

**Table S2** The calculated  $\log K^*$  values of Cu(II) bis-complexes with **L2** and **L3** peptides.

| ${}^a\log K^*$                                      | 2N<br>{2N <sub>Im</sub> } | 4N<br>{2N <sub>Im</sub> , 2N <sup>-</sup> } |
|-----------------------------------------------------|---------------------------|---------------------------------------------|
| Ac-EH <sup>2</sup> KA-NH <sub>2</sub> ( <b>L2</b> ) | -5.67                     | -19.65                                      |
| Ac-KEH <sup>3</sup> K-NH <sub>2</sub> ( <b>L3</b> ) | -5.66                     | -                                           |

<sup>a</sup>The  $\log K^* = \log \beta(\text{CuH}_j\text{L}_2) - \log \beta(\text{H}_n\text{L})$  where the  $j$  corresponds to the number of protons in the coordinated ligand to metal ion and the  $n$  correspond to the number protons of the coordinated ligand and released from ligand during complexation.
